# Supplementary material for: CO2 Hydrogenation over Fe-Co Bimetallic Catalyst Derived from the Thermolysis of [Co(NH3)6][Fe(CN)6]
Source: MDPI journal article supplement (doi:10.3390/catal13121475), 2023-11-28
Supplement: s1 [file s1]

**Table S1.** Kinetic parameters of the first stage of the  $[\text{Co}(\text{NH}_3)_3][\text{Fe}(\text{CN})_6]$  thermolysis process. They were determined using model methods.

| Model   | Reaction stage | The first stage                                                                                         |
|---------|----------------|---------------------------------------------------------------------------------------------------------|
| Fn-Fn   | Fn             | E=130.3 kJ/mol,<br>logA=11.6 (A, 1/s),<br>ReactOrder n=0.9                                              |
|         | Fn             | E=90.2 kJ/mol,<br>logA=5.8 (A, 1/s),<br>ReactOrder n=3.6                                                |
|         | R <sup>2</sup> | 0.99943                                                                                                 |
|         | F-test         | 1.323                                                                                                   |
| Fn-Bna  | Fn             | E=128.9 kJ/mol,<br>logA=11.5 (A, 1/s),<br>ReactOrder n=0.7                                              |
|         | Bna            | E=80.3 kJ/mol,<br>logA=5.1 (A, 1/s),<br>ReactOrder n=4.4,<br>AutocatOrder 0.2                           |
|         | R <sup>2</sup> | 0.99950                                                                                                 |
|         | F-test         | 1.174                                                                                                   |
| Fn-Cnm  | Fn             | E=146.8 kJ/mol,<br>logA=13.5 (A, 1/s),<br>ReactOrder n=5.0                                              |
|         | Cnm            | E=9.2 kJ/mol,<br>logA=8 (A, 1/s),<br>ReactOrder n=0.3,<br>Log(AutocatPreExp) 7.8,<br>AutocatPower m=0.6 |
|         | R <sup>2</sup> | 0.99809                                                                                                 |
|         | F-test         | 4.448                                                                                                   |
| Fn-An   | Fn             | E=131.0 kJ/mol,<br>logA=11.7 (A, 1/s),<br>ReactOrder n=0.7                                              |
|         | An             | E=83.6 kJ/mol,<br>logA=4.9 (A, 1/s),<br>Dimension n=0.4                                                 |
|         | R <sup>2</sup> | 0.99935                                                                                                 |
|         | F-test         | 1.512                                                                                                   |
| Bna-Fn  | Bna            | E=117.9 kJ/mol,<br>logA=10.8 (A, 1/s),<br>ReactOrder n=1.4,<br>AutocatOrder 0.6                         |
|         | Fn             | E=135.9 kJ/mol,<br>logA=13.4 (A, 1/s),<br>ReactOrder n=2.3                                              |
|         | R <sup>2</sup> | 0.99872                                                                                                 |
|         | F-test         | 2.980                                                                                                   |
| Bna-Bna | Bna            | E=126.1 kJ/mol,<br>logA=11.4 (A, 1/s),<br>ReactOrder n=1.4,<br>AutocatOrder 0.3                         |
|         | Bna            | E=79.6 kJ/mol,<br>logA=4.9 (A, 1/s),<br>ReactOrder n=3.7,<br>AutocatOrder 0.2                           |
|         | R <sup>2</sup> | 0.99950                                                                                                 |
|         | F-test         | 1.156                                                                                                   |

|         |                |                                                                                                               |
|---------|----------------|---------------------------------------------------------------------------------------------------------------|
| Bna-Cnm | Bna            | E=127.9 kJ/mol,<br>logA=11.5 (A, 1/s),<br>ReactOrder n=0.7,<br>AutocatOrder 0.2                               |
|         | Cnm            | E=75.6 kJ/mol,<br>logA=4.3 (A, 1/s),<br>ReactOrder n=3.9,<br>AutocatOrder 0.01,<br>AutocatPower m=0.01        |
|         | R <sup>2</sup> | 0.99956                                                                                                       |
|         | F-test         | 1.302                                                                                                         |
| Bna-An  | Bna            | E=121.8 kJ/mol,<br>logA=11.7 (A, 1/s),<br>ReactOrder n=3.5,<br>AutocatOrder 0.6                               |
|         | An             | E=33.7 kJ/mol,<br>logA=0.1 (A, 1/s),<br>Dimension n=0.6                                                       |
|         | R <sup>2</sup> | 0.99906                                                                                                       |
|         | F-test         | 2.184                                                                                                         |
| Cnm-Fn  | Cnm            | E=129.7 kJ/mol,<br>logA=11.6 (A, 1/s),<br>ReactOrder n=4.2,<br>Log(AutocatPreExp) 2.2,<br>AutocatPower m=3.8  |
|         | Fn             | E=49.9 kJ/mol,<br>logA=2.2 (A, 1/s),<br>ReactOrder n=2.75                                                     |
|         | R <sup>2</sup> | 0.99942                                                                                                       |
|         | F-test         | 1.357                                                                                                         |
| Cnm-Bna | Cnm            | E=122.7 kJ/mol,<br>logA=10.4 (A, 1/s),<br>ReactOrder n=5.1,<br>Log(AutocatPreExp) 1.5,<br>AutocatPower m=1.1  |
|         | Bna            | E=189 kJ/mol,<br>logA=18.8 (A, 1/s),<br>ReactOrder n=2.1,<br>AutocatOrder 0.3                                 |
|         | R <sup>2</sup> | 0.99937                                                                                                       |
|         | F-test         | 1.474                                                                                                         |
| Cnm-Cnm | Cnm            | E=121.2 kJ/mol,<br>logA=10.3 (A, 1/s),<br>ReactOrder n=5.3,<br>Log(AutocatPreExp) 1.6,<br>AutocatPower m=1.3  |
|         | Cnm            | E=186.6 kJ/mol,<br>logA=17.7 (A, 1/s),<br>ReactOrder n=2.1,<br>Log(AutocatPreExp) 0.7,<br>AutocatPower m=0.2  |
|         | R <sup>2</sup> | 0.99937                                                                                                       |
|         | F-test         | 1.484                                                                                                         |
| Cnm-An  | Cnm            | E=128.5 kJ/mol,<br>logA=11.4 (A, 1/s),<br>ReactOrder n=1.8,<br>Log(AutocatPreExp) 0.9,<br>AutocatPower m=1.96 |
|         | An             | E=142.2 kJ/mol,                                                                                               |

|        |                |                                                                                                              |
|--------|----------------|--------------------------------------------------------------------------------------------------------------|
|        |                | logA=7.6 (A, 1/s),<br>Dimension n=1.22                                                                       |
|        | R <sup>2</sup> | 0.99945                                                                                                      |
|        | F-test         | 1.286                                                                                                        |
| An-Sb  | An             | E=127.7 kJ/mol,<br>logA=11.4 (A, 1/s),<br>Dimension n=1.2                                                    |
|        | Sb             | E=74.5 kJ/mol<br>logA=4.5 (A, 1/s)<br>Reactorder n=4.0<br>Autocat Order 0.1<br>LogOrder q=0.1                |
|        | R <sup>2</sup> | 0.99955                                                                                                      |
|        | F-test         | 1.051                                                                                                        |
|        |                |                                                                                                              |
| An-Fn  | An             | E=127.7 kJ/mol,<br>logA=11.4 (A, 1/s),<br>Dimension n=1.2                                                    |
|        | Fn             | E=76.3 kJ/mol,<br>logA=4.7 (A, 1/s),<br>ReactOrder n=3.7                                                     |
|        | R <sup>2</sup> | 0.99956                                                                                                      |
|        | F-test         | 1.014                                                                                                        |
|        |                |                                                                                                              |
| An-Bna | An             | E=127.5 kJ/mol,<br>logA=11.4 (A, 1/s),<br>Dimension n=1.2                                                    |
|        | Bna            | E=74.9 kJ/mol,<br>logA=4.6 (A, 1/s),<br>ReactOrder n=3.9,<br>AutocatOrder 0.01                               |
|        | R <sup>2</sup> | 0.99955                                                                                                      |
|        | F-test         | 1.041                                                                                                        |
|        |                |                                                                                                              |
| An-Cnm | An             | E=127.9 kJ/mol,<br>logA=11.4 (A, 1/s),<br>Dimension n=1.2                                                    |
|        | Cnm            | E=75.9 kJ/mol,<br>logA=4.3 (A, 1/s),<br>ReactOrder n=3.7,<br>Log(AutocatPreExp) 0.01,<br>AutocatPower m=0.01 |
|        | R <sup>2</sup> | 0.99956                                                                                                      |
|        | F-test         | 1.023                                                                                                        |
|        |                |                                                                                                              |
| An-An  | An             | E=128.9 kJ/mol,<br>logA=11.6 (A, 1/s),<br>Dimension n=1.2                                                    |
|        | An             | E=8.4 kJ/mol,<br>logA=4.8 (A, 1/s),<br>Dimension n=0.4                                                       |
|        | R <sup>2</sup> | 0.99940                                                                                                      |
|        | F-test         | 1.388                                                                                                        |
|        |                |                                                                                                              |
| Sb-Fn  | Sb             | E=127.8 kJ/mol<br>logA=11.5 (A, 1/s)<br>Reactorder n=0.9<br>Autocat Order 0.01<br>LogOrder q=0.2             |
|        | Fn             | E=76.3 kJ/mol,<br>logA=4.7 (A, 1/s),<br>ReactOrder n=0.8                                                     |
|        | R <sup>2</sup> | 0.999956                                                                                                     |
|        | F-test         | 1.017                                                                                                        |
|        |                |                                                                                                              |

|        |                |                                                                                                          |
|--------|----------------|----------------------------------------------------------------------------------------------------------|
| Sb-Bna | Sb             | E=126.0 kJ/mol<br>logA=11.4 (A, 1/s)<br>Reactorder n=1.5<br>Autocat Order 0.2<br>LogOrder q=0.1          |
|        |                | E=75.2 kJ/mol,<br>logA=4.4 (A, 1/s),<br>ReactOrder n=3.3,<br>AutocatOrder 0.1                            |
|        | R <sup>2</sup> | 0.99950                                                                                                  |
|        | F-test         | 1.158                                                                                                    |
|        |                |                                                                                                          |
| Sb-Cnm | Sb             | E=124.1 kJ/mol<br>logA=11.5 (A, 1/s)<br>Reactorder n=3.1<br>Autocat Order 0.5<br>LogOrder q=0.1          |
|        |                | E=73 kJ/mol,<br>logA=1.8 (A, 1/s),<br>ReactOrder n=3.1,<br>Log(AutocatPreExp) 5.9,<br>AutocatPower m=0.3 |
|        | R <sup>2</sup> | 0.99920                                                                                                  |
|        | F-test         | 1.865                                                                                                    |
|        |                |                                                                                                          |
| Sb-An  | Sb             | E=136.7 kJ/mol<br>logA=13.9 (A, 1/s)<br>Reactorder n=5.5<br>Autocat Order 0.7<br>LogOrder q=0.2          |
|        |                | E=42 kJ/mol,<br>logA=2.6 (A, 1/s),<br>Dimension n=0.2                                                    |
|        | R <sup>2</sup> | 0.99869                                                                                                  |
|        | F-test         | 3.057                                                                                                    |
|        |                |                                                                                                          |
| Sb-Sb  | Sb             | E=124.5 kJ/mol<br>logA=11.6 (A, 1/s)<br>Reactorder n=3.3<br>Autocat Order 0.5<br>LogOrder q=0.1          |
|        |                | E=69.4 kJ/mol<br>logA=4.3 (A, 1/s)<br>Reactorder n=4.5<br>Autocat Order 0.1<br>LogOrder q=0.9            |
|        | R <sup>2</sup> | 0.99922                                                                                                  |
|        | F-test         | 1.814                                                                                                    |
|        |                |                                                                                                          |
| Fn-Sb  | Fn             | E=129.6 kJ/mol,<br>logA=11.7 (A, 1/s),<br>ReactOrder n=5.7                                               |
|        |                | E=140.9 kJ/mol<br>logA=14.7 (A, 1/s)<br>Reactorder n=0.8<br>Autocat Order 1.1<br>LogOrder q=0.1          |
|        | R <sup>2</sup> | 0.99735                                                                                                  |
|        | F-test         | 6.180                                                                                                    |
|        |                |                                                                                                          |
| Bna-Sb | Bna            | E=92.8 kJ/mol,<br>logA=8.6 (A, 1/s),<br>ReactOrder n=3.4,<br>AutocatOrder 0.8                            |

|        |        |                                                                                                            |
|--------|--------|------------------------------------------------------------------------------------------------------------|
|        | Sb     | E=53.1 kJ/mol<br>logA=4.2 (A, 1/s)<br>Reactorder n=4.6<br>Autocat Order 0.1<br>LogOrder q=10               |
|        |        | R <sup>2</sup> 0.99824                                                                                     |
|        | F-test | 4.107                                                                                                      |
|        | Cnm    | E=127.3 kJ/mol<br>logA= 11.1 (A, 1/s)<br>Reactorder n=1.2<br>Log(AutocatPreExp) 0.4<br>Autocat Power m=0.8 |
|        |        | E=77.6 kJ/mol<br>logA=4.8 (A, 1/s)<br>Reactorder n=3.7<br>Autocat Order 0.4<br>LogOrder q=0.8              |
|        | Sb     | R <sup>2</sup> 0.99957                                                                                     |
| Cnm-Sb | F-test | 1.000                                                                                                      |

**Table S2.** Kinetic parameters of the second stage of the [Co(NH)<sub>3</sub>]<sub>6</sub>[Fe(CN)<sub>6</sub>] thermolysis process. They were determined using model methods.

| Reaction step  | The second stage                                                                                           |
|----------------|------------------------------------------------------------------------------------------------------------|
| Fn             | E=371.1 kJ/mol,<br>logA=20.0(A, 1/s),<br>ReactOrder n=0.6                                                  |
| R <sup>2</sup> | 0.99609                                                                                                    |
| F-test         | 5.379                                                                                                      |
| Bna            | E=344.8 kJ/mol,<br>logA=19(A, 1/s),<br>ReactOrder n=1.7,<br>AutocatOrder 0.5                               |
| R <sup>2</sup> | 0.99867                                                                                                    |
| F-test         | 1.830                                                                                                      |
| Cnm            | E=345.7 kJ/mol<br>logA= 18.2 (A, 1/s)<br>Reactorder n=2.8<br>Log(AutocatPreExp) 1.6<br>Autocat Power m=1.7 |
| R <sup>2</sup> | 0.99928                                                                                                    |
| F-test         | 1.000                                                                                                      |
| An             | E=350.6 kJ/mol,<br>logA=18.9(A, 1/s),<br>Dimension n=1.4                                                   |
| R <sup>2</sup> | 0.99757                                                                                                    |
| F-test         | 3.341                                                                                                      |
| Sb             | E=344.9 kJ/mol<br>logA=19 (A, 1/s)<br>Reactorder n=1.9<br>Autocat Order 0.1<br>LogOrder q=0.5              |
| R <sup>2</sup> | 0.99870                                                                                                    |
| F-test         | 1.795                                                                                                      |
